# Supplementary material for: Water-Soluble Truncated Fatty Acid–Porphyrin Conjugates Provide Photo-Sensitizer Activity for Photodynamic Therapy in Malignant Mesothelioma
Source: MDPI journal article supplement (doi:10.3390/cancers14215446), 2022-11-05
Supplement: s1 [file s1]

## Supporting Information

### 5,10,15,20-Tetrakis(ethyl-5-(3-phenoxy)pentanoate)-21H,23H-porphyrin, 2

To 1 (0.53g, 0.78 mmol) and  $\text{Cs}_2\text{CO}_3$  (1.22g, 3.75 mmol) mmol was added acetonitrile (50ml). The reaction mixture was stirred at reflux for 15 min protected by an  $\text{N}_2$  atmosphere. To this reaction mixture ethyl-5-bromovalerate (0.78g, 3.75 mmol) was added and refluxed for a further 41 hrs protected by an  $\text{N}_2$  atmosphere. The reaction was allowed to cool and the solvent removed under reduced pressure, the resulting purple solid was dissolved in EtOAc (50ml) and washed with 2M NaOH(aq) (3x50ml), brine (2x50ml) and dried with  $\text{Na}_2\text{SO}_4$ . Solvent was removed under reduced pressure and the crude product purified on silica (100g). Fractions containing the desired product were condensed under reduced pressure to give 2 (0.43g, 0.36 mmol, 46%) of purple solid.

$^1\text{H}$  NMR (400MHz,  $\text{d-CDCl}_3$ )  $\delta$  8.92 (s, 2H), 7.83 (d, 1H,  $J=4$  Hz), 7.79 (s, 1H), 7.66, (dd, 1H,  $J=8.1$ Hz,  $J=8$  Hz), 7.34 (d, 1H,  $J=8$  Hz), 4.20 (t, 2H,  $J=6$  Hz), 4.14 (t, 2H,  $J=8$ ), 2.44 (t, 2H,  $J=8$  Hz) 1.97-1.90 (m, 4H), 1.25 (t, 3H,  $J=7$  Hz), -2.79 (s, 0.5H).

FTIR (neat,  $\nu_{\text{max}}$   $\text{cm}^{-1}$ ) 3300, 2930, 2880, 1729, 1594 ;

MS (ES+)  $m/z$  (%) = 596.3  $[\text{M}+2\text{H}]^{2+}$  (30), 1191.5  $[\text{M}+\text{H}]^{1+}$  (100) ;

HRMS (ES+): calculated for  $\text{C}_{72}\text{H}_{79}\text{N}_4\text{O}_{12}$ : 1191.5695 ; found 1191.5694 ;

UV/Vis (DMSO)  $\lambda_{\text{max}}/\text{nm}$  ( $\epsilon/\text{mol}^{-1}\text{cm}^{-1}$ ) 421 ( $\epsilon=3.8*10^5$ ), 514 ( $\epsilon=2.0*10^4$ ), 549 ( $8.0*10^3$ ), 590 ( $\epsilon=6.6*10^3$ ), 644 ( $\epsilon=4.9*10^3$ ).

### 5,10,15,20-Tetrakis(ethyl-6-(3-phenoxy)hexanoate)-21H,23H-porphyrin, 3

To 1 (1.283g, 1.89 mmol) and  $\text{Cs}_2\text{CO}_3$  (2.96g, 9.07 mmol), acetonitrile (Dry)(100ml) was added. The mixture was refluxed for 15 mins while protected by an  $\text{N}_2$  atmosphere. Then ethyl 6-bromohexanoate (2.02g, 1.61ml, 9.07 mmol) was added and left to reflux protected by an  $\text{N}_2$  atmosphere for 18 hrs. The reaction vessel was allowed to cool to room temperature and the solvent was removed under reduced pressure. The resulting purple gum was dissolved in EtOAc (100ml) and washed with 2M NaOH (3x100ml), brine (2x100ml) and dried with  $\text{Na}_2\text{SO}_4$ . Solvent was removed under reduced pressure, the crude product purified on silica (100g) eluting with DCM:EtOAc. Fractions containing only the desired product (by TLC) were condensed under reduced pressure to give 3 (0.856g, 0.69 mmol, 36%) of purple solid.

$^1\text{H}$  NMR (400MHz,  $\text{d-CDCl}_3$ ) 8.81 (s, 2H), 7.71 (d, 1H,  $J=8$  ), 7.68 (s, 1H), 7.54 (dd, 1H,  $J=8$  ,  $J=8$  ), 7.22 (d, 1H,  $J=8$  ), 4.07-3.99 (m, 4H), 2.25 (t, 2H,  $J=7$  , 1.83-1.77 (m, 2H) 1.66-1.60 (m, 2H), 1.52-1.44 (m, 2H), 1.13 (t, 3H,  $J=8$  ) -2.95 (s, 0.5H);

FTIR (neat,  $\nu_{\text{max}}$   $\text{cm}^{-1}$ ) 3316, 2934, 2866, 1728, 1594, 1574;

MS (ES+)  $m/z$  (%) = 624.3  $[\text{M}+2\text{H}]^{2+}$  (25), 1247.7  $[\text{M}+\text{H}]^{1+}$  (100);

HRMS (ES+): calculated for  $\text{C}_{76}\text{H}_{87}\text{N}_4\text{O}_{12}$ : 1247.6320 ; found 1247.6307;

UV/Vis (DMSO)  $\lambda_{\max}/\text{nm}$  ( $\epsilon/\text{mol}^{-1}\text{cm}^{-1}$ ) 422 ( $\epsilon=3.2*10^5$ ), 514 ( $\epsilon=6.7*10^3$ ), 550 ( $\epsilon=2.4*10^3$ ), 588 ( $\epsilon=1.9*10^3$ ), 644 ( $\epsilon=1.3*10^3$ ).

#### **5,10,15,20-Tetrakis(ethyl-7-(3-phenoxy)heptanoate)-21H,23H-porphyrin, 4**

To 1 (0.51 g, 0.75 mmol) and  $\text{Cs}_2\text{CO}_3$  (1.18 g, 3.61 mmol) was added acetonitrile (50ml). The reaction was stirred while protected by an  $\text{N}_2$  atmosphere for 15 mins at reflux. Ethyl-7-bromoheptanoate (0.86g, 0.70ml, 3.61 mmol) was added and the reaction mixture was refluxed for 41 hrs protected by a  $\text{N}_2$  atmosphere. The reaction mixture was allowed to cool and the solvent was removed under reduced pressure. The product was dissolved in EtOAc (50ml) and washed with 2M NaOH (3x50ml), brine (2x50ml) and dried with  $\text{Na}_2\text{SO}_4$ . Solvent was removed under reduced pressure and the crude product purified on silica (100g). Fractions containing only the desired product were condensed under reduced pressure to give 4 (0.53g, 0.41 mmol, 54%) of purple solid.

$^1\text{H}$  NMR (400MHz,  $\text{d-CDCl}_3$ )  $\delta$  8.91 (s, 2H), 7.82 (d, 1H,  $J = 8$ ), 7.79 (s, 1H), 7.65 (dd, 1H,  $J = 8$ ,  $J = 8$ ), 7.34 (d, 1H,  $J = 7.8$ ), 4.16 (t, 2H,  $J = 6.$ ), 4.12 (q, 2H,  $J = 7$ ), 2.34-2.30 (m, 2H), 1.94-1.87 (m, 2H), 1.73-1.65 (m), 1.61-1.53 (m, 2H), 1.48-1.42 (m, 2H), 1.24 (t, 3H,  $J=7,$ ), -2.79 (s, 0.5H),

$^{13}\text{C}$  NMR (100MHz,  $\text{d-CDCl}_3$ ); 173.8, 157.5, 143.4, 127.6, 127.5, 121.0, 119.9, 114.1, 68.1, 60.2, 34.3, 29.3, 28.9, 25.8, 24.9, 14.24.

FTIR (neat,  $\nu_{\max} \text{ cm}^{-1}$ ) 3300, 2930, 2850, 1731, 1595;

MS (ES+)  $m/z$  (%)= 652 (40), 1304 [ $\text{M}+\text{H}^+$ ] (100);

HRMS (ES+): calculated for  $\text{C}_{80}\text{H}_{95}\text{N}_4\text{O}_{12}$ : 1304.65 ; found 1303.6946;

UV/Vis (DMSO)  $\lambda_{\max}/\text{nm}$  ( $\epsilon/\text{mol}^{-1}\text{cm}^{-1}$ ) 421 ( $\epsilon=3.9*10^5$ ), 514 ( $\epsilon=1.7*10^4$ ), 549 ( $\epsilon=6.2*10^3$ ), 588 ( $\epsilon=5.1*10^3$ ), 646 ( $\epsilon=3.5*10^3$ )

#### **5,10,15,20-Tetrakis(5-(3-phenoxy)pentanoic acid)-21H,23H-porphyrin, C5SHU**

To 3 (0.32g, 0.27 mmol), methanol (50ml) was added, brought to reflux then allowed to cool. Potassium hydroxide (0.60g, 10.74 mmol) was added to the solution, brought to reflux and left overnight. The solvent was removed under reduced pressure and dissolved in deionised water (250ml), washed with DCM (150ml) and neutralised with 5% citric acid (200ml). The solution was checked with indicator paper and the product extracted with DCM (3x80ml). The organic layer was collected and condensed under reduced pressure to give 5 (0.20g, 0.19 mmol, 69%) of purple solid.

$^1\text{H}$  NMR (400MHz,  $\text{d}_6\text{-DMSO}$ ) 12.05 (s, 1H), 8.89 (s, 2H), 7.79-7.77 (m, 2H), 7.69 (dd, 1H,  $J=8 \text{ Hz}$ ,  $J=8 \text{ Hz}$ ), 7.40 (d, 1H,  $J=8 \text{ Hz}$ ), 4.17 (t, 2H,  $J=6 \text{ Hz}$ ), 2.30 (t, 2H,  $J=7 \text{ Hz}$ ), 1.83-1.68 (m, 4H) -2.94 (s, 0.5H);

FTIR (neat,  $\nu_{\max} \text{ cm}^{-1}$ ) 3350, 2940, 2890, 1704, 1595;

MS (ES+)  $m/z$  (%)= 1080 [ $\text{M}+\text{H}^+$ ](100);

HRMS (ES+): calculated for  $\text{C}_{64}\text{H}_{62}\text{N}_4\text{O}_{12}$ : 1079.4442 ; found 1079.4417;

UV/Vis (DMSO)  $\lambda_{\text{max}}/\text{nm}$  ( $\epsilon/\text{mol}^{-1}\text{cm}^{-1}$ ) 421 ( $\epsilon=2.2 \times 10^5$ ), 515 ( $\epsilon=1.0 \times 10^4$ ), 550 ( $\epsilon=4.1 \times 10^3$ ), 590 ( $\epsilon=3.3 \times 10^3$ ), 647 ( $\epsilon=2.3 \times 10^3$ ).

#### **5,10,15,20-Tetrakis(6-(3-phenoxy)hexanoic acid)-21H,23H-porphyrin, C6SHU**

To a suspension 3 (0.096g, 0.077 mmol) in methanol (25ml) was added potassium hydroxide (0.34g, 6.2 mmol) brought to reflux and left overnight. The solvent was removed under reduced pressure and dissolved in deionised water (50ml), washed with DCM (50ml) and neutralised with 5% citric acid. The aqueous layer was checked with indicator paper and the product extracted with DCM (2x50ml). The organic layer was collected and condensed under reduced pressure to give 6 (0.086g, 0.075 mmol, 98%) of purple solid.

$^1\text{H}$  NMR (400MHz,  $d_6$ -DMSO)  $\delta$ : 8.87 (s, 2H), 7.77 (m, 2H), 7.69 (dd, 1H,  $J=8\text{Hz}$ ,  $J=8\text{Hz}$ ), 7.39 (d, 1H,  $J=8\text{Hz}$ ), 4.16 (t, 2H,  $J=6\text{Hz}$ ), 2.23-2.19 (m, 2H), 1.83-1.77 (m, 2H), 1.59-1.53 (m, 2H), 1.49-1.44 (m, 2H), -2.95 (s, 0.5H);

FTIR (neat,  $\nu_{\text{max}}$   $\text{cm}^{-1}$ ) 2918, 2861, 1702.43, 1592, 1573;

MS (ES-)  $m/z$  (%)=, 566.3 [M-2H] (45), 1133.5 [M-H] (100);

HRMS (ES-): calculated for  $\text{C}_{68}\text{H}_{69}\text{N}_4\text{O}_{12}$ : 1133.4917; found 1133.4915;

UV/Vis (DMSO)  $\lambda_{\text{max}}/\text{nm}$  ( $\epsilon/\text{mol}^{-1}\text{cm}^{-1}$ ) 421 ( $\epsilon=1.9 \times 10^5$ ), 515 ( $\epsilon=7.3 \times 10^3$ ), 550 ( $\epsilon=2.7 \times 10^3$ ), 590 ( $\epsilon=2.2 \times 10^3$ ), 647 ( $\epsilon=1.6 \times 10^3$ ).

#### **5,10,15,20-Tetrakis(7-(3-phenoxy)heptanoic acid)-21H,23H-porphyrin, C7SHU**

To 4 (0.50g, 0.84 mmol), methanol (50ml) was added, brought to reflux then allowed to cool. Potassium hydroxide (0.86g, 15.3 mmol) was added to the solution, brought to reflux and left overnight. The solvent was removed under reduced pressure and dissolved in deionised water (250ml), washed with DCM (150ml) and neutralised with 5% citric acid (200ml). The solution was checked with indicator paper and the product extracted with DCM (3x80ml). The organic layer was collected and condensed under reduced pressure to give 6 (0.43g, 0.36 mmol, 94%) of purple solid.

$^1\text{H}$  NMR (400MHz,  $d_6$ -DMSO) 8.87 (s, 2H), 7.76-7.74 (m, 2H), , 7.68 (dd, 1H,  $J=8\text{ Hz}$ ,  $J=8\text{ Hz}$ ), 7.39 (d, 1H,  $J=8\text{ Hz}$ ), 4.14 (t, 2H,  $J=6\text{ Hz}$ ), 2.16 (m, 2H), 1.79-1.76 (m, 2H), 1.50-1.41 (m, 4H), 1.36-1.24 (m, 2H), -2.96 (s, 0H) ;

FTIR (neat,  $\nu_{\text{max}}$   $\text{cm}^{-1}$ ) 3300, 2931, 2880, 1702, 1594;

MS (ES+)  $m/z$  (%)= 1191.6 [M+H+] (100);

HRMS (ES+): calculated for  $\text{C}_{72}\text{H}_{79}\text{N}_4\text{O}_{12}$ : 1191.5728 [M+H+] ; found 1191.5729;

UV/Vis (DMSO)  $\lambda_{\text{max}}/\text{nm}$  ( $\epsilon/\text{mol}^{-1}\text{cm}^{-1}$ ) 421 ( $\epsilon=5 \times 10^5$ ), 515 ( $\epsilon=2.2 \times 10^4$ ), 550 ( $\epsilon=8.2 \times 10^3$ ), 590 ( $\epsilon=6.6 \times 10^3$ ), 645 ( $\epsilon=4.7 \times 10^3$ ).

## NMR Spectra

### 5,10,15,20-Tetrakis(ethyl-5-(3-phenoxy)pentanoate)-21H,23H-porphyrin, 2

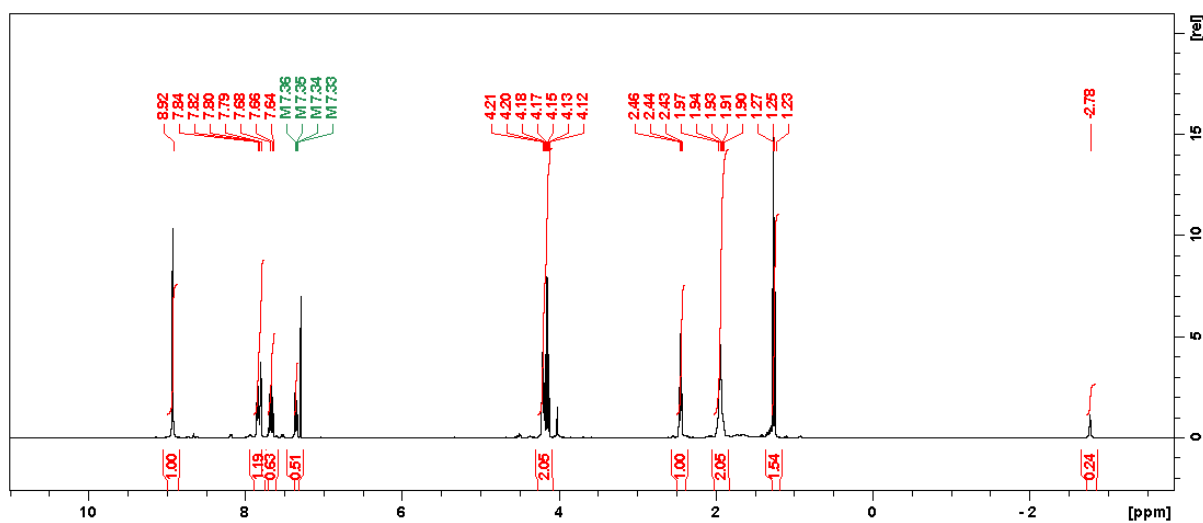

### 5,10,15,20-Tetrakis(ethyl-6-(3-phenoxy)hexanoate)-21H,23H-porphyrin, 3

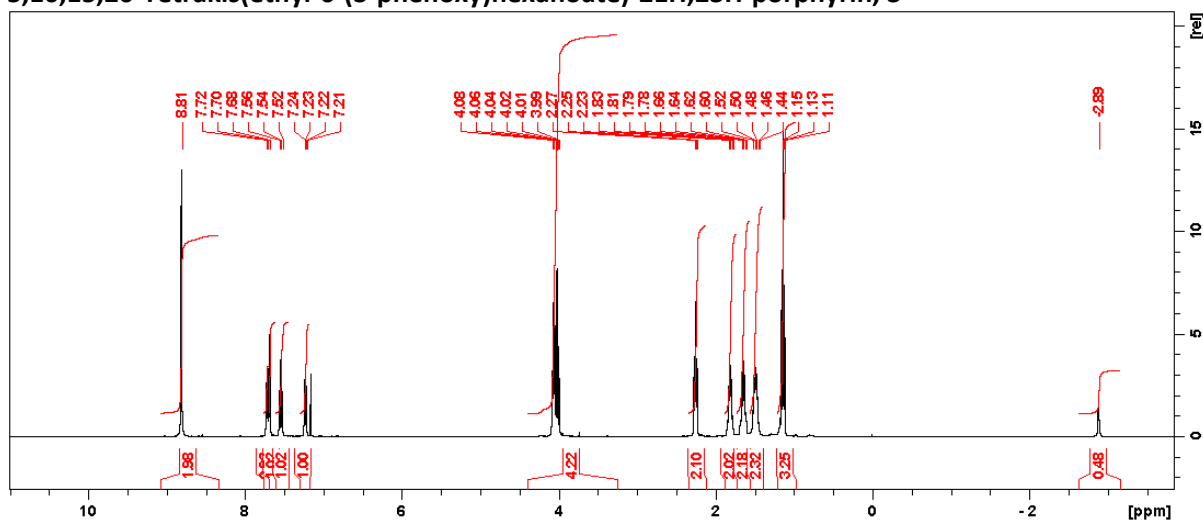

### 5,10,15,20-Tetrakis(ethyl-7-(3-phenoxy)heptanoate)-21H,23H-porphyrin, 4

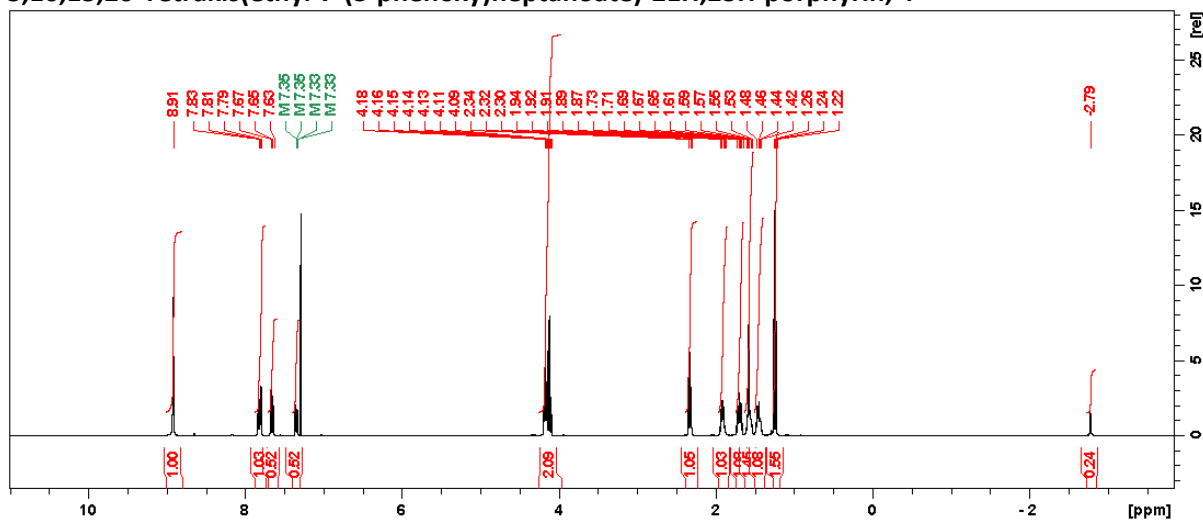

5,10,15,20-Tetrakis(5-(3-phenoxy)pentanoic acid)-21H,23H-porphyrin, C5SHU

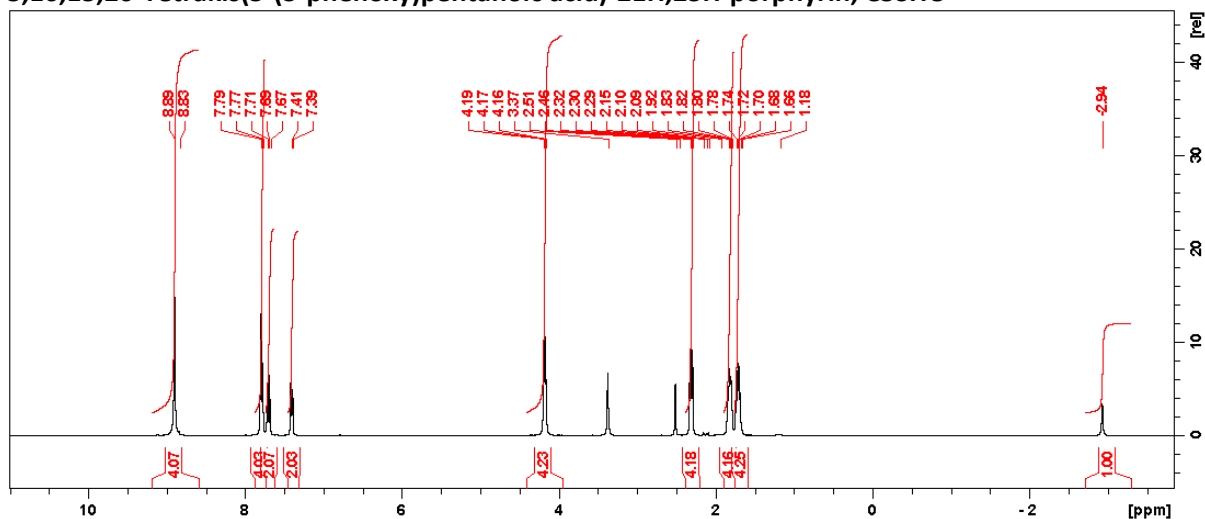

5,10,15,20-Tetrakis(6-(3-phenoxy)hexanoic acid)-21H,23H-porphyrin, C6SHU

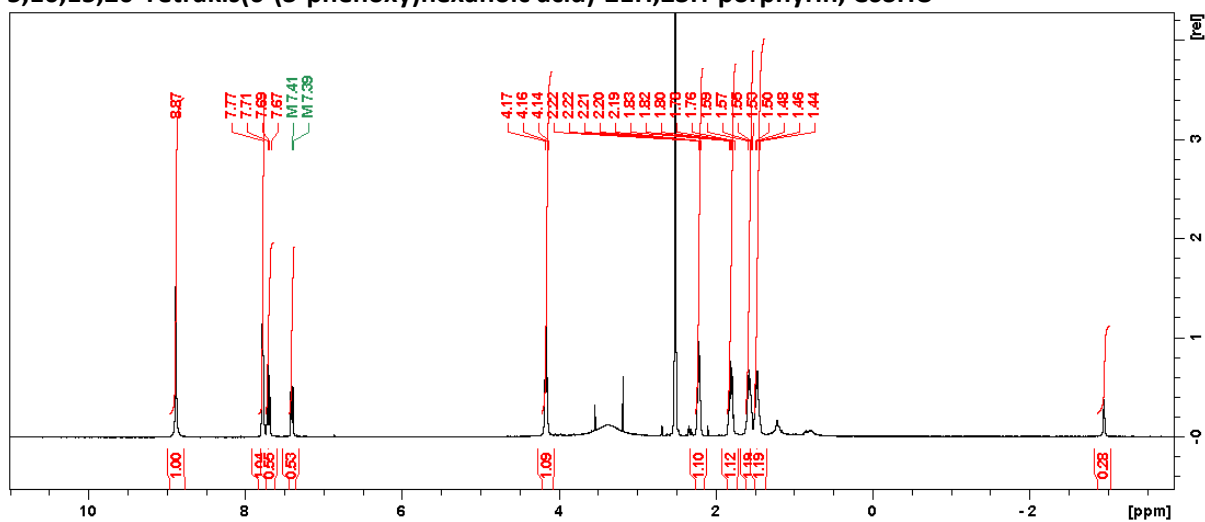

5,10,15,20-Tetrakis(7-(3-phenoxy)heptanoic acid)-21H,23H-porphyrin, C7SHU

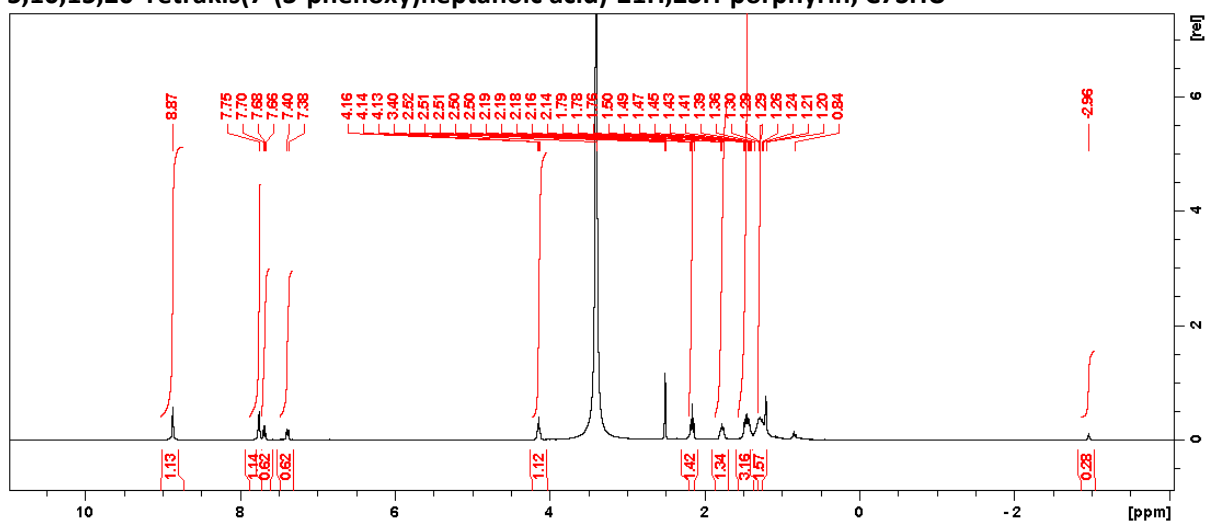

## Mass spectrometry data for C5SHU, C6SHU and C7SHU

### Mass spectrometry for C5SHU

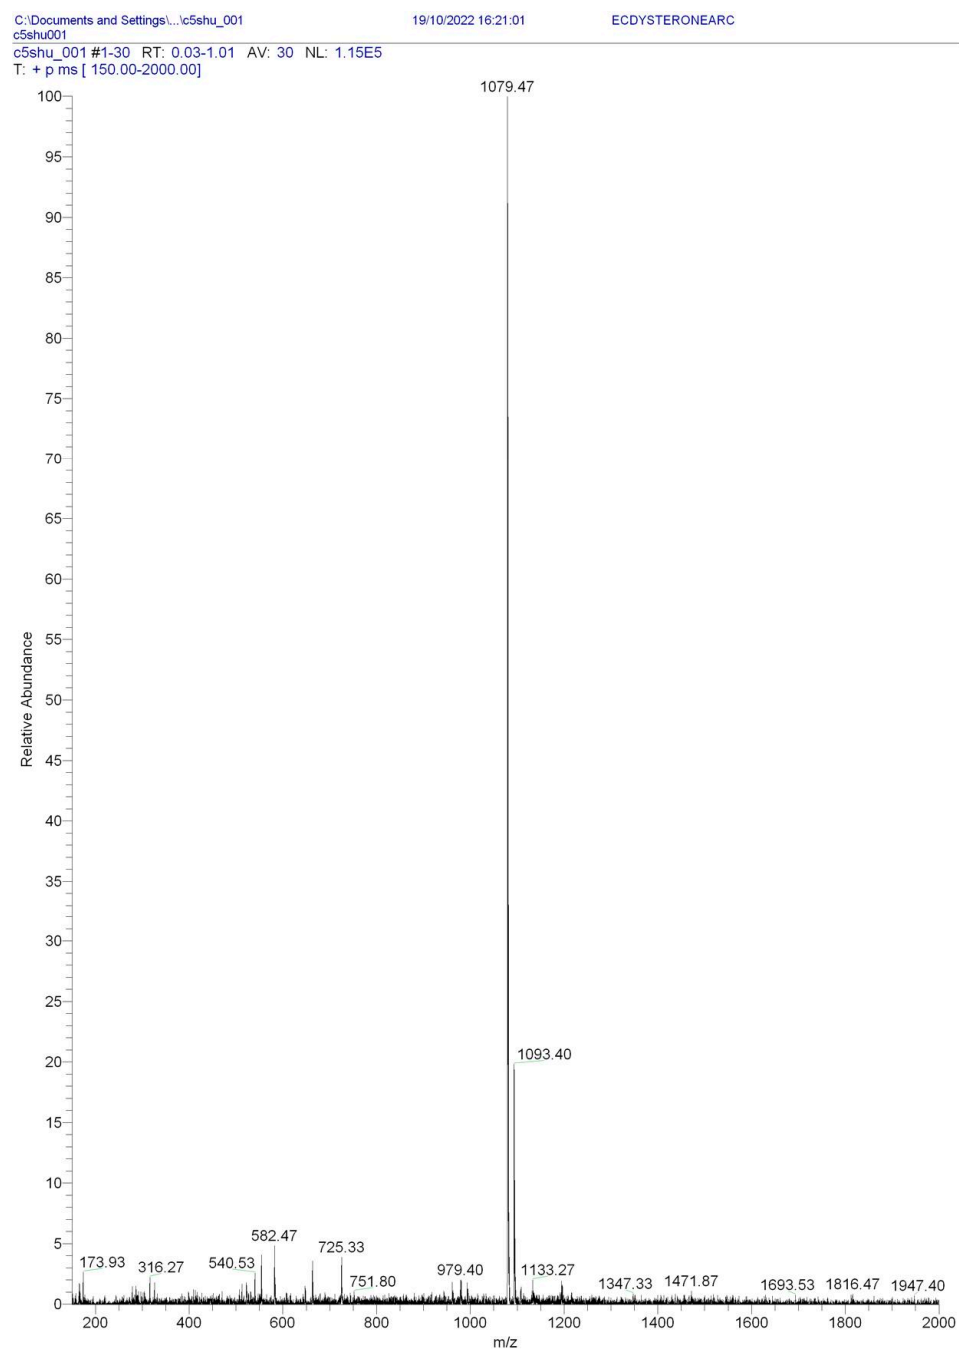

# Mass spectrometry for C6SHU

C:\Documents and Settings\...lc5shu\_001  
c5shu001

19/10/2022 16:21:01

ECDYSTERONEARC

c5shu\_001 #1-30 RT: 0.03-1.01 AV: 30 NL: 1.15E5  
T: + p ms [ 150.00-2000.00]

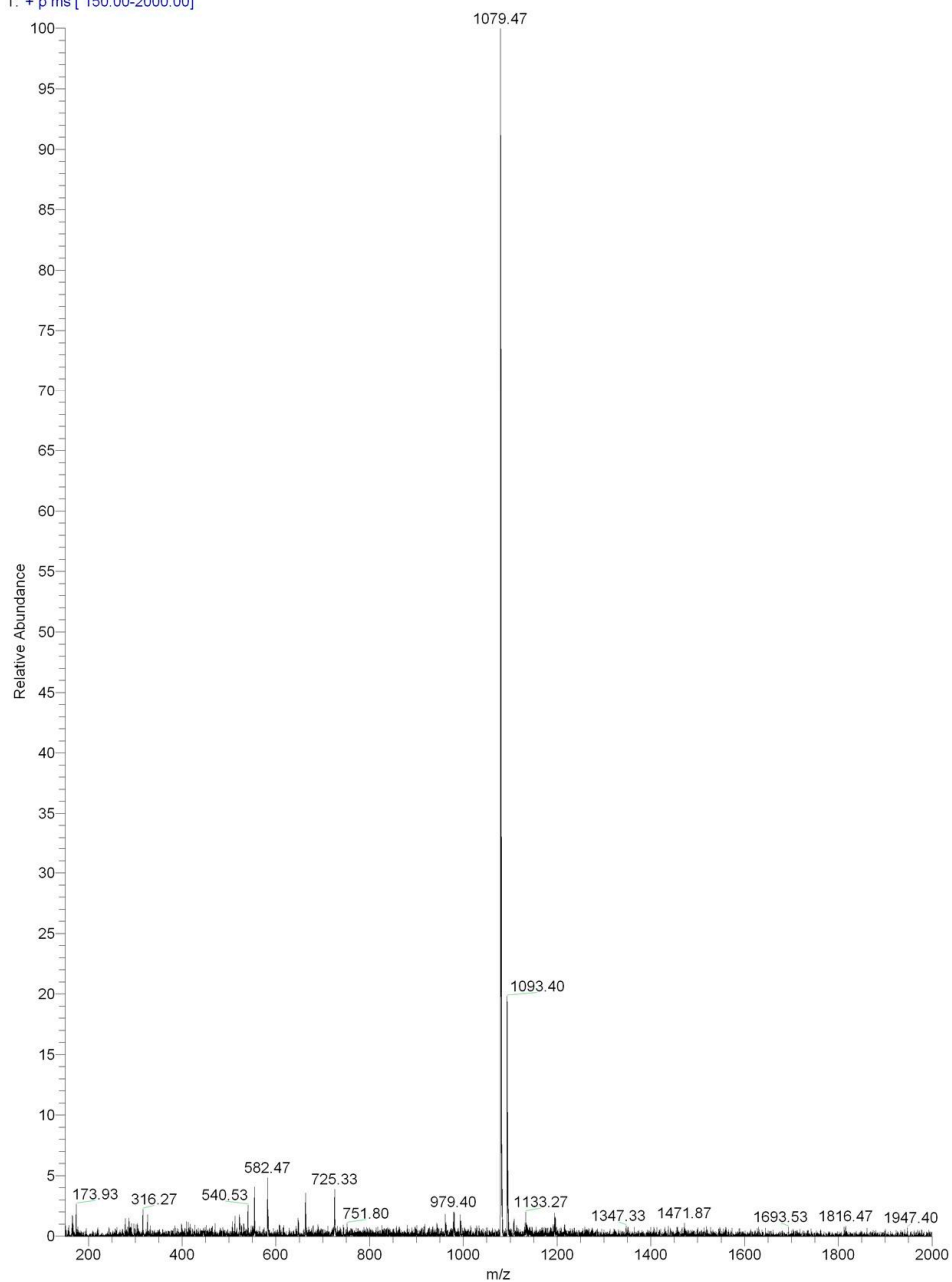

# Mass spectrometry data for C7SHU

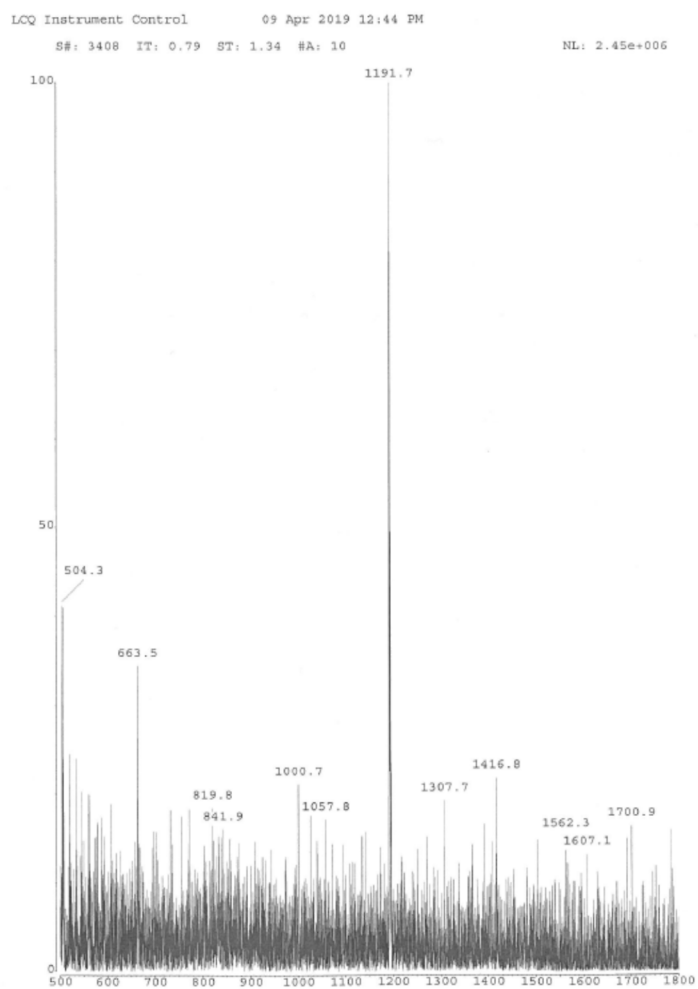



## Representative UV/vis absorbance coefficient measurement in DMSO

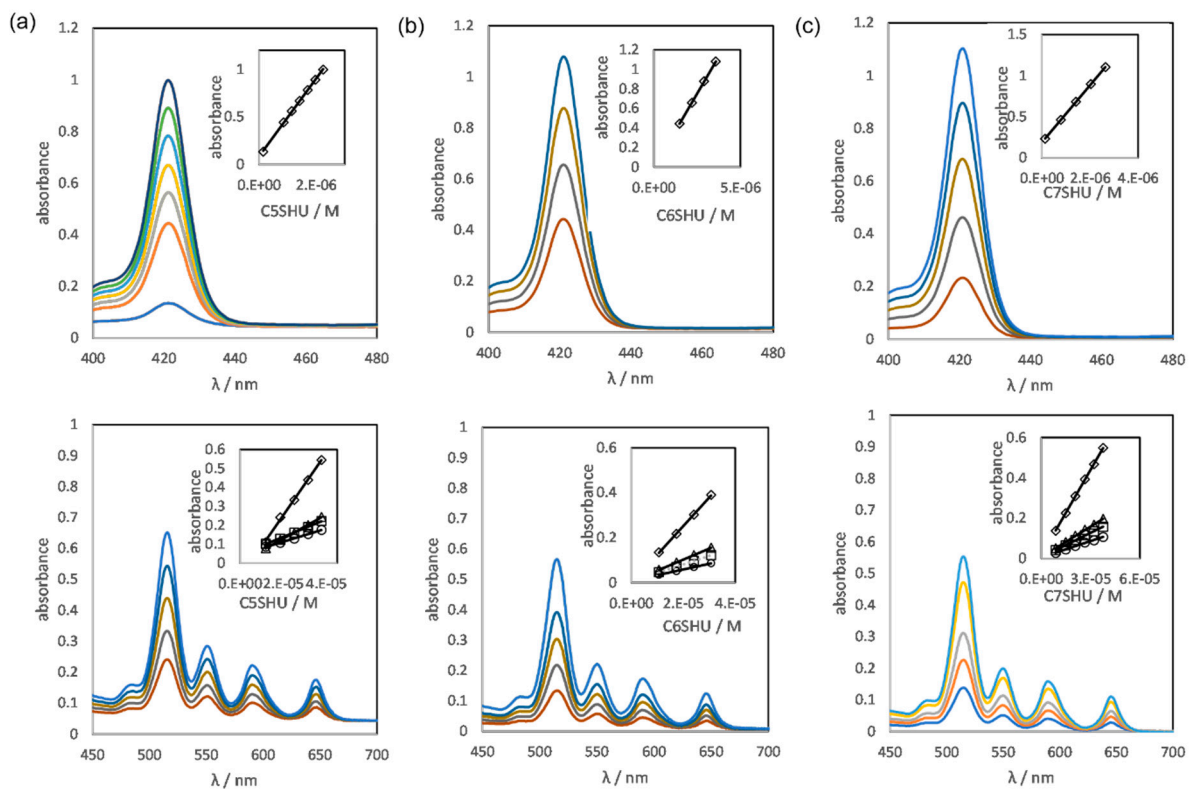

**Figure S1.** UV/vis absorbance coefficient measurement in DMSO for (a) C5SHU Soret band 421 nm  $R^2 = 1.000$ , Q-band 515 nm  $R^2 = 0.998$ , Q-band 550 nm  $R^2 = 0.999$ , Q-band 590 nm  $R^2 = 0.998$  and Q-band 647 nm  $R^2 = 0.998$  (b) C6SHU Soret band 421 nm  $R^2 = 1.000$ , Q-band 515 nm  $R^2 = 0.999$ , Q-band 550 nm  $R^2 = 0.999$ , Q-band 590 nm  $R^2 = 0.999$  and Q-band 647 nm  $R^2 = 0.999$  (c) C7SHU Soret band 421 nm  $R^2 = 1.000$ , Q-band 515 nm  $R^2 = 1.000$ , Q-band 550 nm  $R^2 = 0.999$ , Q-band 590 nm  $R^2 = 0.999$  and Q-band 645 nm  $R^2 = 0.997$ .

MSTO-211H + C5SHU 24-hour treatment

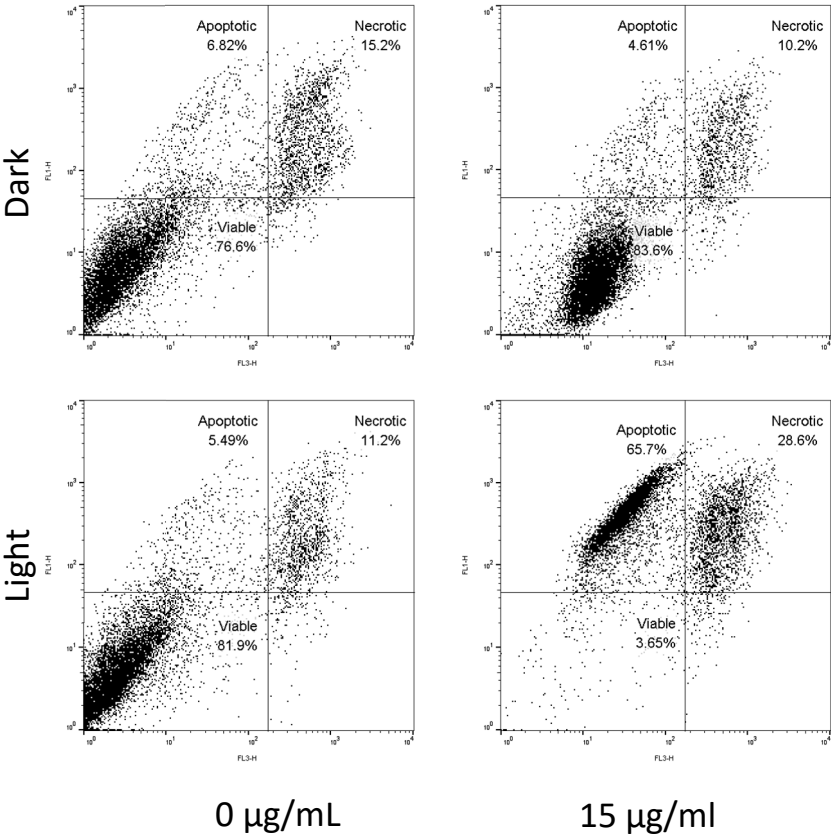

## MET-5a + C5SHU 24-hour treatment

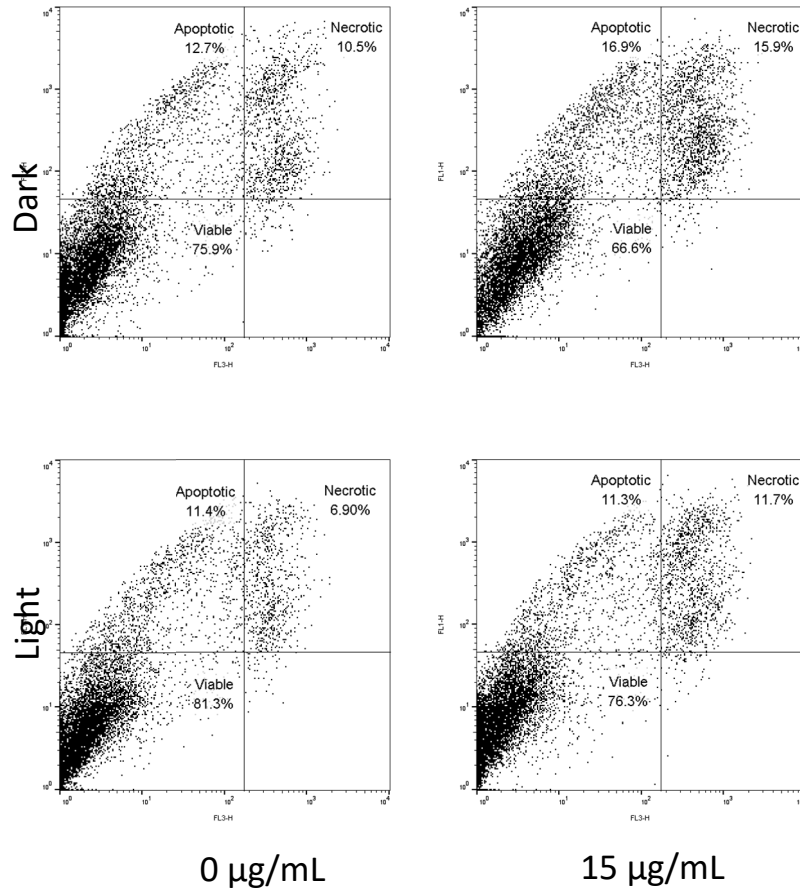

## H28 + C5SHU 24-hour treatment

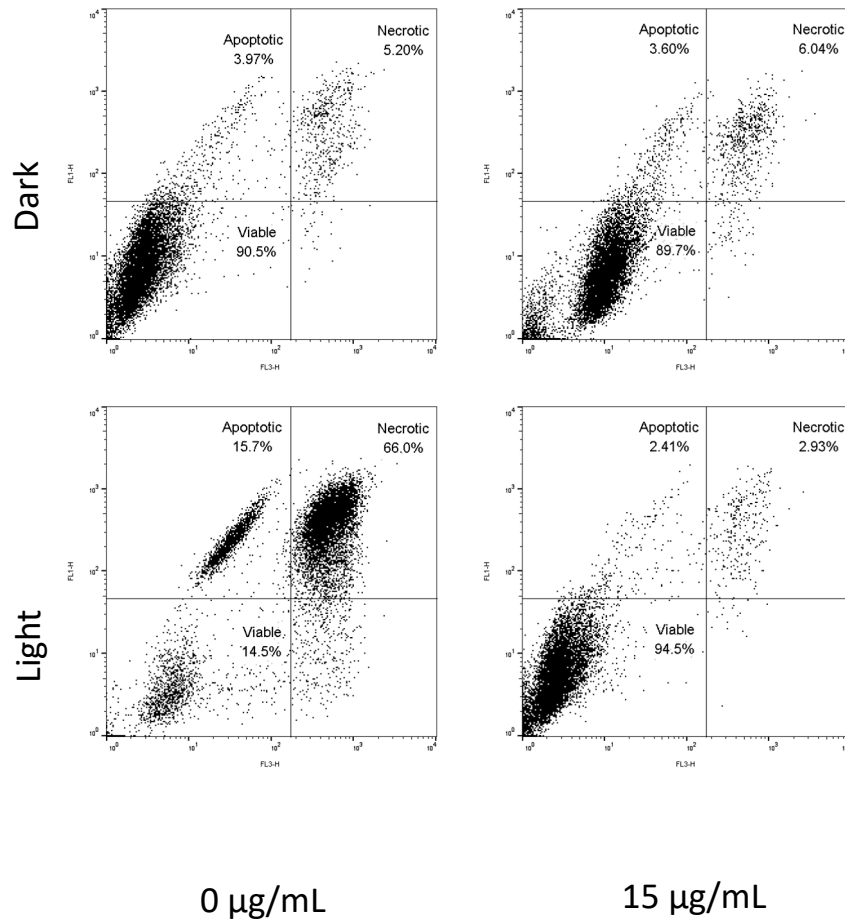

**Figure S2. Representative C5SHU-treated MSTO-211H, NCI-H28 and Met-5a cells as determined by the Annexin V-FITC/PI assay 24 hours after treatment.** Each density plot shows viable cells (Annexin<sup>-</sup> PI<sup>-</sup>), apoptotic cells (Annexin<sup>+</sup> PI<sup>-</sup>); and necrotic cells (Annexin<sup>-</sup> PI<sup>+</sup>).

**Funding**

The authors are grateful to acknowledge funding provided by Sheffield Hallam University.

**Author Contributions**

Sam Bonsall, Simeon Hubbard (data curation and investigation, original draft preparation), Uthaman Jithin, Joseph Anslow, Dylan Todd, Callum Rowding, Tom Filarowski, Greg Duly, Ryan Wilson, Jack Porter (data curation and investigation) Simon Turega & Sarah Haywood-Small (conceptualization; methodology, reviewing and editing and project supervision).

**Institutional Review Board Statement**

Not applicable

**Conflicts of Interest**

The authors declare no conflict of interest
